# Supplementary material for: Human Platelet Lysate-Loaded Poly(ethylene glycol) Hydrogels Induce Stem Cell Chemotaxis In Vitro
Source: PubMed Central journal article supplement (PMC8382254; doi:10.1021/acs.biomac.1c00573), 2021-07-27
Supplement: bm1c00573_si_001.pdf [file bm1c00573_si_001.pdf]

# Human platelet lysate-loaded PEG hydrogels induce stem cell chemotaxis *in vitro*

## Supporting information

*Aman S. Chahal* †, *Manuel Gómez-Florit* ‡, *Rui M. A. Domingues* ‡, *Manuela E. Gomes* ‡,

*Hanna Tiainen* †

†Department of Biomaterials, Institute of Clinical Dentistry, University of Oslo, Geitmyrsveien 69-71, 0455 Oslo, Norway.

‡3B's Research Group, I3Bs – Research Institute on Biomaterials, Biodegradables and Biomimetics, University of Minho, Headquarters of the European Institute of Excellence on Tissue Engineering and Regenerative Medicine, Avepark – Parque de Ciência e Tecnologia, Zona Industrial da Gandra, 4805-017 Barco – Guimarães, Portugal

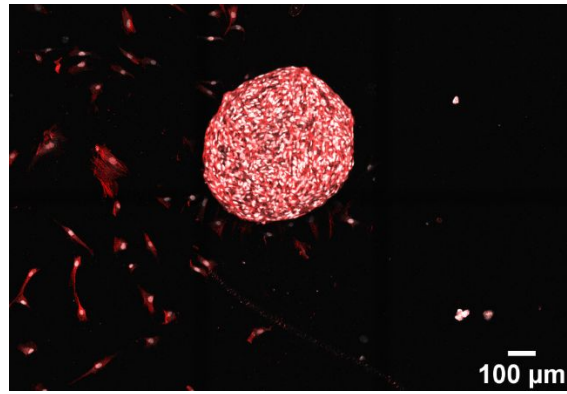

Figure S1: CLSM image of an hMSC spheroid encapsulated within an SDF1 $\alpha$ -PEG hydrogel. Actin filaments are shown in red and nuclei in white.

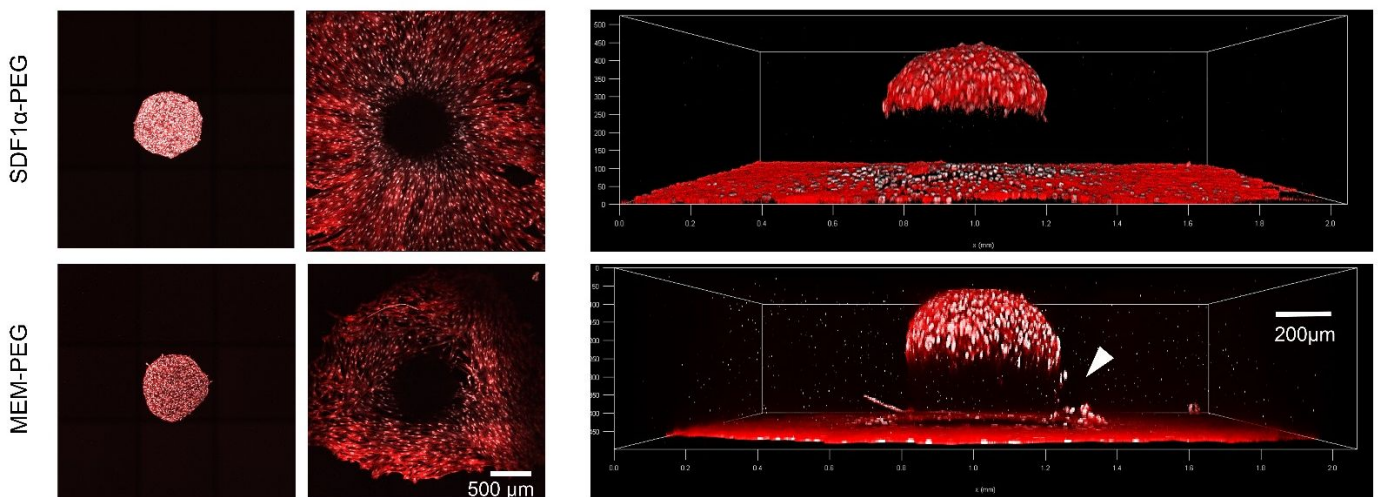

Figure S2: CLSM images of spheroids encapsulated in SDF-1 $\alpha$  and MEM loaded hydrogels. Images illustrate that the spheroid and cells around the spheroid exist on different z-planes. Cross-sectional panels on the right show only part of the spheroid, due to focal distance limitations. Cells appear to detach from the spheroid in MEM-PEG hydrogels, indicated by the white arrowhead.

Table S1: Mean concentrations of chemokines in stock platelet lysates. Max release refers to the maximum concentration of each chemokine or growth factor that can be released from each PL-PEG hydrogel. Mean  $\pm$  SD (n =3). \* indicates values that are above the detection limit of the assay.

| <b>Chemokine/Growth<br/>Factor</b> | <b>Stock Concentration<br/>(pg/mL)</b> | <b>Max release (100%)<br/>(pg/mL)</b> |
|------------------------------------|----------------------------------------|---------------------------------------|
| PDGF-BB                            | *                                      | 6796.2 $\pm$ 2608.4                   |
| IL-8                               | 1009.2 $\pm$ 384.4                     | 135.0 $\pm$ 1.5                       |
| EGF                                | 1154.4 $\pm$ 646.8                     | 165.1 $\pm$ 3.0                       |
| VEGF                               | 183.0 $\pm$ 34.6                       | 22.6 $\pm$ 5.6                        |
| CCL3                               | 144.3 $\pm$ 6.8                        | 58.5 $\pm$ 0.0                        |
| IL-4                               | 30.0 $\pm$ 3.7                         | 10.6 $\pm$ 0.8                        |
| FGF2                               | 187.5 $\pm$ 19.1                       | 35.1 $\pm$ 1.3                        |
| PDGF-AA                            | 3078.8 $\pm$ 161.5                     | 835.1 $\pm$ 92.3                      |
| CCL2                               | 161.7 $\pm$ 10.6                       | 20.6 $\pm$ 0.4                        |
